# Supplementary material for: AKT1 but not AKT2 single nucleotide polymorphisms are associated with the risk of microscopic polyangiitis
Source: PeerJ journal article supplement (doi:10.7717/peerj.20791), 2026-02-16
Supplement: VCF_file_conversions_staff_EH.pdf [file VCF_file_conversions_staff_EH.pdf]

## Sample population URL:

<https://www.internationalgenome.org/data-portal/sample>

## Data collections:

<https://www.internationalgenome.org/data-portal/data-collection/phase-3>

For downstream analyses, VCF files were converted to PED/MAP format using the VCF to PED Converter provided by IGSR:

<https://grch37.ensembl.org/Multi/Tools/VcftoPed>

## File URL:

AKT1rs2498786

[https://ftp.1000genomes.ebi.ac.uk/vol1/ftp/release/20130502/ALL.chr14.phase3\\_shapeit2\\_mvncall\\_integrated\\_v5b.20130502.genotypes.vcf.gz](https://ftp.1000genomes.ebi.ac.uk/vol1/ftp/release/20130502/ALL.chr14.phase3_shapeit2_mvncall_integrated_v5b.20130502.genotypes.vcf.gz)

The screenshot shows the 'VCF to PED Converter results' page for the variant AKT1\_rs2498786. The page includes a sidebar with 'Web Tools' and a main content area with 'Job details'. The job name is AKT1\_rs2498786, the species is Human, and the assembly is GRCh37. The region is 14:105262368-105262368. The file URL is [https://ftp.1000genomes.ebi.ac.uk/vol1/ftp/release/20130502/ALL.chr14.phase3\\_shapeit2\\_mvncall\\_integrated\\_v5b.20130502.genotypes.vcf.gz](https://ftp.1000genomes.ebi.ac.uk/vol1/ftp/release/20130502/ALL.chr14.phase3_shapeit2_mvncall_integrated_v5b.20130502.genotypes.vcf.gz). The sample population URL is [https://ftp.1000genomes.ebi.ac.uk/vol1/ftp/release/20130502/integrated\\_call\\_samples\\_v3.20130502.ALL.panel](https://ftp.1000genomes.ebi.ac.uk/vol1/ftp/release/20130502/integrated_call_samples_v3.20130502.ALL.panel). The population(s) are ACB,ASW,BEB,CDX,CEU,CHB,CHS,CLM,ESN,FIN,GBR,GH,GWD,IBS,ITU,JPT,KHV,LWK,MSL,MXL,PEL,PJL,PUR,STU,TSI,YRI. The base format is letters and the biallelic only option is No. The page also includes buttons for 'Download Marker Information File', 'Download Linkage Pedigree File', and 'New job'.

This block shows a detailed view of the variant AKT1\_rs2498786. It includes the variant name, a trash icon, the species 'Human', the assembly 'GRCh37', the region '14:105262368-105262368', the file URL [https://ftp.1000genomes.ebi.ac.uk/vol1/ftp/release/20130502/ALL.chr14.phase3\\_shapeit2\\_mvncall\\_integrated\\_v5b.20130502.genotypes.vcf.gz](https://ftp.1000genomes.ebi.ac.uk/vol1/ftp/release/20130502/ALL.chr14.phase3_shapeit2_mvncall_integrated_v5b.20130502.genotypes.vcf.gz), and the sample population URL [https://ftp.1000genomes.ebi.ac.uk/vol1/ftp/release/20130502/integrated\\_call\\_samples\\_v3.20130502.ALL.panel](https://ftp.1000genomes.ebi.ac.uk/vol1/ftp/release/20130502/integrated_call_samples_v3.20130502.ALL.panel).

AKT1rs2498801

[https://ftp.1000genomes.ebi.ac.uk/vol1/ftp/release/20130502/ALL.chr14.phase3\\_shapeit2\\_mvncall\\_integrated\\_v5b.20130502.genotypes.vcf.gz](https://ftp.1000genomes.ebi.ac.uk/vol1/ftp/release/20130502/ALL.chr14.phase3_shapeit2_mvncall_integrated_v5b.20130502.genotypes.vcf.gz)

This block shows a detailed view of the variant AKT1rs2498801. It includes the variant name, a trash icon, the species 'Human', the assembly 'GRCh37', the region '14:105235558-105235558', the file URL [https://ftp.1000genomes.ebi.ac.uk/vol1/ftp/release/20130502/ALL.chr14.phase3\\_shapeit2\\_mvncall\\_integrated\\_v5b.20130502.genotypes.vcf.gz](https://ftp.1000genomes.ebi.ac.uk/vol1/ftp/release/20130502/ALL.chr14.phase3_shapeit2_mvncall_integrated_v5b.20130502.genotypes.vcf.gz), and the sample population URL [https://ftp.1000genomes.ebi.ac.uk/vol1/ftp/release/20130502/integrated\\_call\\_samples\\_v3.20130502.ALL.panel](https://ftp.1000genomes.ebi.ac.uk/vol1/ftp/release/20130502/integrated_call_samples_v3.20130502.ALL.panel).

AKT1rs1130233

[https://ftp.1000genomes.ebi.ac.uk/vol1/ftp/release/20130502/ALL.chr14.phase3\\_shapeit2\\_mvncall\\_integrated\\_v5b.20130502.genotypes.vcf.gz](https://ftp.1000genomes.ebi.ac.uk/vol1/ftp/release/20130502/ALL.chr14.phase3_shapeit2_mvncall_integrated_v5b.20130502.genotypes.vcf.gz)

AKT1rs1130233

 

 Human

GRCh37

14:105239894-105239894

[https://ftp.1000genomes.ebi.ac.uk/vol1/ftp/release/20130502/ALL.chr14.phase3\\_shapeit2\\_mvncall\\_integrated\\_v5b.20130502.genotypes.vcf.gz](https://ftp.1000genomes.ebi.ac.uk/vol1/ftp/release/20130502/ALL.chr14.phase3_shapeit2_mvncall_integrated_v5b.20130502.genotypes.vcf.gz)

[https://ftp.1000genomes.ebi.ac.uk/vol1/ftp/release/20130502/integrated\\_call\\_samples\\_v3.20130502.ALL.panel](https://ftp.1000genomes.ebi.ac.uk/vol1/ftp/release/20130502/integrated_call_samples_v3.20130502.ALL.panel)

AKT1rs2494737

[https://ftp.1000genomes.ebi.ac.uk/vol1/ftp/release/20130502/ALL.chr14.phase3\\_shapeit2\\_mvncall\\_integrated\\_v5b.20130502.genotypes.vcf.gz](https://ftp.1000genomes.ebi.ac.uk/vol1/ftp/release/20130502/ALL.chr14.phase3_shapeit2_mvncall_integrated_v5b.20130502.genotypes.vcf.gz)

AKT1rs2494737

 

 Human

GRCh37

14:105246325-105246325

[https://ftp.1000genomes.ebi.ac.uk/vol1/ftp/release/20130502/ALL.chr14.phase3\\_shapeit2\\_mvncall\\_integrated\\_v5b.20130502.genotypes.vcf.gz](https://ftp.1000genomes.ebi.ac.uk/vol1/ftp/release/20130502/ALL.chr14.phase3_shapeit2_mvncall_integrated_v5b.20130502.genotypes.vcf.gz)

[https://ftp.1000genomes.ebi.ac.uk/vol1/ftp/release/20130502/integrated\\_call\\_samples\\_v3.20130502.ALL.panel](https://ftp.1000genomes.ebi.ac.uk/vol1/ftp/release/20130502/integrated_call_samples_v3.20130502.ALL.panel)

AKT2rs7254617

[https://ftp.1000genomes.ebi.ac.uk/vol1/ftp/release/20130502/ALL.chr19.phase3\\_shapeit2\\_mvncall\\_integrated\\_v5b.20130502.genotypes.vcf.gz](https://ftp.1000genomes.ebi.ac.uk/vol1/ftp/release/20130502/ALL.chr19.phase3_shapeit2_mvncall_integrated_v5b.20130502.genotypes.vcf.gz)

AKT2rs7254617

 

 Human

GRCh37

19:40791512-40791512

[https://ftp.1000genomes.ebi.ac.uk/vol1/ftp/release/20130502/ALL.chr19.phase3\\_shapeit2\\_mvncall\\_integrated\\_v5b.20130502.genotypes.vcf.gz](https://ftp.1000genomes.ebi.ac.uk/vol1/ftp/release/20130502/ALL.chr19.phase3_shapeit2_mvncall_integrated_v5b.20130502.genotypes.vcf.gz)

[https://ftp.1000genomes.ebi.ac.uk/vol1/ftp/release/20130502/integrated\\_call\\_samples\\_v3.20130502.ALL.panel](https://ftp.1000genomes.ebi.ac.uk/vol1/ftp/release/20130502/integrated_call_samples_v3.20130502.ALL.panel)

AKT2rs969531

[https://ftp.1000genomes.ebi.ac.uk/vol1/ftp/release/20130502/ALL.chr19.phase3\\_shapeit2\\_mvncall\\_integrated\\_v5b.20130502.genotypes.vcf.gz](https://ftp.1000genomes.ebi.ac.uk/vol1/ftp/release/20130502/ALL.chr19.phase3_shapeit2_mvncall_integrated_v5b.20130502.genotypes.vcf.gz)

AKT2rs969531

 

 Human

GRCh37

19:40778866-40778866

[https://ftp.1000genomes.ebi.ac.uk/vol1/ftp/release/20130502/ALL.chr19.phase3\\_shapeit2\\_mvncall\\_integrated\\_v5b.20130502.genotypes.vcf.gz](https://ftp.1000genomes.ebi.ac.uk/vol1/ftp/release/20130502/ALL.chr19.phase3_shapeit2_mvncall_integrated_v5b.20130502.genotypes.vcf.gz)

[https://ftp.1000genomes.ebi.ac.uk/vol1/ftp/release/20130502/integrated\\_call\\_samples\\_v3.20130502.ALL.panel](https://ftp.1000genomes.ebi.ac.uk/vol1/ftp/release/20130502/integrated_call_samples_v3.20130502.ALL.panel)

AKT2rs3730051

[https://ftp.1000genomes.ebi.ac.uk/vol1/ftp/release/20130502/ALL.chr19.phase3\\_shapeit2\\_mvncall\\_integrated\\_v5b.20130502.genotypes.vcf.gz](https://ftp.1000genomes.ebi.ac.uk/vol1/ftp/release/20130502/ALL.chr19.phase3_shapeit2_mvncall_integrated_v5b.20130502.genotypes.vcf.gz)

AKT2rs3730051

 

 Human

GRCh37

19:40744697-40744697

[https://ftp.1000genomes.ebi.ac.uk/vol1/ftp/release/20130502/ALL.chr19.phase3\\_shapeit2\\_mvncall\\_integrated\\_v5b.20130502.genotypes.vcf.gz](https://ftp.1000genomes.ebi.ac.uk/vol1/ftp/release/20130502/ALL.chr19.phase3_shapeit2_mvncall_integrated_v5b.20130502.genotypes.vcf.gz)

[https://ftp.1000genomes.ebi.ac.uk/vol1/ftp/release/20130502/integrated\\_call\\_samples\\_v3.20130502.ALL.panel](https://ftp.1000genomes.ebi.ac.uk/vol1/ftp/release/20130502/integrated_call_samples_v3.20130502.ALL.panel)
